1 **The physiological adaptation for the “fore-mid” four-legged walking behavior of the**  
2 **pygmy mole cricket *Xya sichuanensis***

3

4 Yi Zhang<sup>1</sup>, Shuying Wang<sup>2</sup>, Zhu-Jun Feng<sup>1</sup>, Tong-Xian Liu<sup>1</sup>, Chengquan Cao<sup>3\*</sup>

5

6 <sup>1</sup>Northwest A&F University, Key Laboratory of Integrated Pest Management on Crops in

7 Northwestern Loess Plateau of Ministry of Agriculture, Yangling, Shaanxi, 712100, China

8 <sup>2</sup>Shandong Agricultural University, College of Plant Protection, Tai'an, Shandong, 271000,

9 China

10 <sup>3</sup>Leshan Normal University, College of Life Science, Leshan, Sichuan, 614000, China

11 **\*Corresponding author:** email: cchq@lsnu.edu.cn

12

13 Y. Z.: yizhang085@nwafu.edu.cn

14 S.Y.W.: 2018110337@sdau.edu.cn

15 Z. J. F.: fzj050193@nwafu.edu.cn

16 T.X. L.: txliu@nwafu.edu.cn.

17 **Abstract**

18 Animals have developed numerous specialized biological characteristics due to selective  
19 pressure from the environment. The pygmy mole cricket *Xya sichuanensis* has well-developed  
20 saltatorial hind legs for jumping and benefits for its survival, but these legs cannot be used for  
21 walking. Therefore, the typical tripedal gait used by most insects with six legs is not possible,  
22 and *X. sichuanensis* walks exclusively using its fore and mid legs. In this study, we describe a  
23 “fore-mid” walking pattern in *X. sichuanensis*. Further, we sought to deepen our  
24 understanding of the biological and physiological adaptations of this “four-legged” insect. We  
25 found the positions of tarsi points relative to the ground, integrated hind leg-abdomen  
26 structure, thickened ventral cuticle, and leg movements during walking to all show a unique  
27 biological adaptation. Of interest, *X. sichuanensis* was observed to demonstrate four-legged  
28 walking, underlining the general theme that insects have strong plasticity at both  
29 physiological and behavioral levels. We suggest that on an evolutionary timescale, *X.*  
30 *sichuanensis* has developed behavioral characteristics such as optimized jumping behavior  
31 and a unique walking pattern alongside specialized anatomical adaptations to enable survival  
32 in a competitive environment. This study could help explain biological and physiological  
33 adaptations for insects’ behaviors with important implications for the study of diversity in  
34 insect locomotion.

35

36 Key word: pygmy mole cricket, locomotion, physiological adaptation, morphology

## 37 **1. Introduction**

38 Animals' locomotion is often used as a method to avoid danger and to rapidly adapt to  
39 environmental changes. Walking and jumping are two types of locomotion behaviors for  
40 many insect species, and help respond to different types of threats (Burrows 2003; 2009;  
41 Burrows and Picker, 2010). Jumping, as a strategy to escape predators or to launch into flight,  
42 normally requires particularly specialized legs (typically the hind legs), and this specialization  
43 often affects patterns of walking (Usherwood and Runion 1970; Burns 1973; Burrows and  
44 Sutton, 2013).

45 Most adult insects have six fully functional legs adapted to walk, and a tripedal gait is most  
46 common (Hughes 1952; Wilson 1966; Dickinson et al., 2000). During this standard  
47 movement process, for each step, three legs touch the ground in a triangle shape to yield a  
48 stable stance. In a stride cycle, the middle leg on one side and the fore and hind legs on the  
49 other side are placed on the ground to form a triangle, and the other three legs are lifted and  
50 moved forward; after these lifted legs reach their position to form a new triangle, the first  
51 three legs begin to lift and move forward in a continuous symmetrical cycle (Wilson 1966;  
52 Cruse 1976; Full and Tu 1991). However, this pattern is sometimes varied under conditions  
53 such as running, and insects can also adjust their gait to cope with the loss of one or more legs  
54 (Grabowska et al., 2012).

55 Quadrupedalism (walking with four legs), is alternatively used in many animal species,  
56 especially in vertebrate animals, including mammals and reptiles (Full and Tu 1991;  
57 Dickinson et al., 2000). For many animals, during walking, the motion of legs on either side  
58 of the body alternates, or alternates between the front and back legs. "Four-legged" walking  
59 insects have also been observed, such as mantis (Mantodea) (Roeder 1937), water striders  
60 (Gerridae) (Dickinson 2003; Hu et al., 2003), and brush-footed butterflies (Nymphalidae)  
61 (Wolfe et al., 2011); one pair of legs (normally fore legs) of these insect species are often

62 adapted for seizing, predation, or is simply reduced in size and not used for walking. In most  
63 Orthoptera species, the hind legs are saltatorial and possess a well-developed femur muscle  
64 adapted for jumping. Although their hind legs are specialized and are used both for jumping  
65 and walking, Orthoptera species such as locusts or grasshoppers use an alternating tripod gait  
66 (Usherwood and Runion 1970; Burns 1973). In most cases, these species use all six legs when  
67 walking (Wilson 1966; Burns 1973).

68 The pygmy mole crickets are a small species of Orthoptera (Burns 1973; Burrows and  
69 Sutton 2012). They normally live in banks by fresh water and have been used as an  
70 environmental indicator for dynamic river systems in Europe (Münsch et al., 2013). These  
71 insects exhibited many special behaviors based on their biological structures (Burrows and  
72 Picker 2010; Burrows and Sutton 2012).

73 The pygmy mole cricket species has short wings and mole-like fore legs that can be used to  
74 build burrows for nesting (Burrows and Picker 2010). Pygmy mole crickets also have a pair of  
75 well-developed saltatorial hind legs like some other Orthoptera species that can be used for  
76 jumping from land or even from water to avoid threats (Burrows and Picker 2010; Burrows  
77 and Sutton 2012). The legs of the pygmy mole cricket, especially the hind legs, have been  
78 described in detail in previous studies as they relate to jumping behaviors: many unique and  
79 specifically developed structures have been documented in the hind femur and tibia for  
80 jumping. However, according to our findings, the hind legs are too specialized to be used for  
81 walking (Burrows and Picker 2010). We assumed that these biological features necessitate  
82 that pygmy mole crickets walk on only four legs, not using the typical tripedal gait.

83 Four-legged insects and their patterns of movement have been studied in some detail  
84 (Burns 1973; Hu et al., 2003; Wolfe et al.; 2011; Grabowska et al.,2012). However, the  
85 pygmy mole cricket is different from typical “mid-hind legs” insects, instead walking with  
86 “fore-mid leg” motion. In this study, we sought to understand the biological adaptations of the

87 pygmy mole cricket that allow four-legged motion and characterized its walking pattern,  
88 through biological parameters analysis, SEM scanning, HE staining and walking pattern  
89 analysis. This study could be helpful for understanding the biological adaptations that underlie  
90 insects' behavior and carries new insights relevant to the study of walking in insects.

91

## 92 **2. Materials and Methods**

### 93 2.1. Insects

94 Pygmy mole crickets *Xya sichuanensis* (Cao et al, 2018) were collected from Leshan,  
95 Sichuan providence, China (29.5751° N 103.7534° E). The insects were kept in containers  
96 with a base of moist sand under long-day conditions (16L:8D; 20 ± 1°C; > 80% RH) at the  
97 College of Life Science, Leshan Normal University, Leshan, Sichuan, China, and experiments  
98 were conducted at the Key Laboratory of Applied Entomology, Northwest A&F University,  
99 Yangling, Shaanxi, China.

### 100 2.2. Images collection

101 Digital image acquisition and body length measurement were performed using a  
102 Panasonic DMC-GH4 digital camera (Panasonic, Osaka, Japan) attached to a dissecting  
103 microscope SDPTOP-SZN71 system (Sunny, Hangzhou, Zhejiang, China). The parameters  
104 were measured by ImageJ software (Wayne Rasband, National Institutes of Health, Bethesda,  
105 Maryland, USA)

### 106 2.3. SEM and Histological sectioning and staining

107 The anatomy of the legs and abdomen were examined by electron microscopy and  
108 histological sectioning and staining. Samples for scanning electron microscopy (SEM) were  
109 treated with 2.5% glutaraldehyde fixative for 24 h, ultrasonically cleaned for 3 min, and  
110 washed with 3 mol/L phosphate buffer (pH = 7) 3 times (10 min/time). Next, samples were  
111 placed in dehydrated stepwise using ethanol (70%, 80%, 90% and 100%) and, finally, dried at

112 room temperature for 12 h. After angle adjustment, the samples were sputter-coated with gold  
113 and images were taken under scanning electron microscope (Accelerating voltage: 10.0 kV).

114       Histological sectioning and staining were performed at the third abdominal segment  
115 (A3) of adult *X. sichuanensis* in cross section. The samples were fixed in 10% (v/v) buffered  
116 formalin overnight, dehydrated, embedded in paraffin, and sectioned. Slides were prepared by  
117 soaking in xylene twice for 20 min, 100% alcohol twice for 5 min, and 75% alcohol for 5 min,  
118 followed by rinsing with water. The slides were then immersed in hematoxylin solution for  
119 3–5 min and rinsed with water. The sections were destained with acid alcohol and rinsed,  
120 treated with ammonia solution and rinsed in slowly-running tap water, and then placed in 85%  
121 alcohol for 5 min, 95% alcohol for 5 min, and eosin for 5 min. The sections were dehydrated  
122 3 times with 100% alcohol (each for 5 min), treated with xylene twice (each for 5 min), and  
123 mounted with resin. Digital images were acquired using a Nikon DS-Ri1 camera (Nikon,  
124 Tokyo, Japan), a Nikon 80i microscope system (Nikon, Tokyo, Japan), and Nis-Elements v.  
125 3.22.14 (Build 736, Nikon, Tokyo, Japan). Cuticle thickness was determined from the digital  
126 images. Four different parts of the abdominal cuticle were measured. Abdominal sections of  
127 wingless *A. pisum* and *B. germanica* (both of them are “walkers” and cannot fly) were also  
128 performed for cuticular thickness detection. Cuticular thickness were calculated by software  
129 Nis-Elements v. 3.22.14.

#### 130 2.4. Walking patterns

131       Walking patterns of *X. sichuanensis* were analyzed from video recordings. In order to  
132 prevent jumping during video collection, the hind legs of *X. sichuanensis* were removed, and  
133 then insects were allowed to recover for 48 hours before experiments. Video files were  
134 recorded for ~5 min using a Panasonic DMC-GH4 digital camera (Panasonic, Osaka, Japan)  
135 with a macro lens (Canon® Macro lens EF 100 mm 1:2.8 L IS USM, Canon, Japan; equivalent  
136 focal length: 200 mm). The camera was set to high-speed recording (96 fps) at the highest

137 resolution (1920X1080). Movement speed and leg movements were analyzed from recorded  
138 files by ImageJ and EthoVision XT (Noldus Information Technology, Wageningen, the  
139 Netherlands).

## 140 2.5. Statistical analyses

141 Values of biological parameters were subjected to one-way analysis of variance  
142 (ANOVA). Differences among means were calculated using Duncan's test at a significance  
143 level of  $P < 0.05$ .

144

## 145 **3. Results**

### 146 3.1. Legs

147 We found *X. sichuanensis* fore legs to be the shortest (femur,  $0.722 \pm 0.013$  mm; tibia,  
148  $0.529 \pm 0.011$  mm;  $N = 5$ , Fig. 1C), and the line connecting two fore tarsi points intersected  
149 the midline inside the body (Fig. 1G).



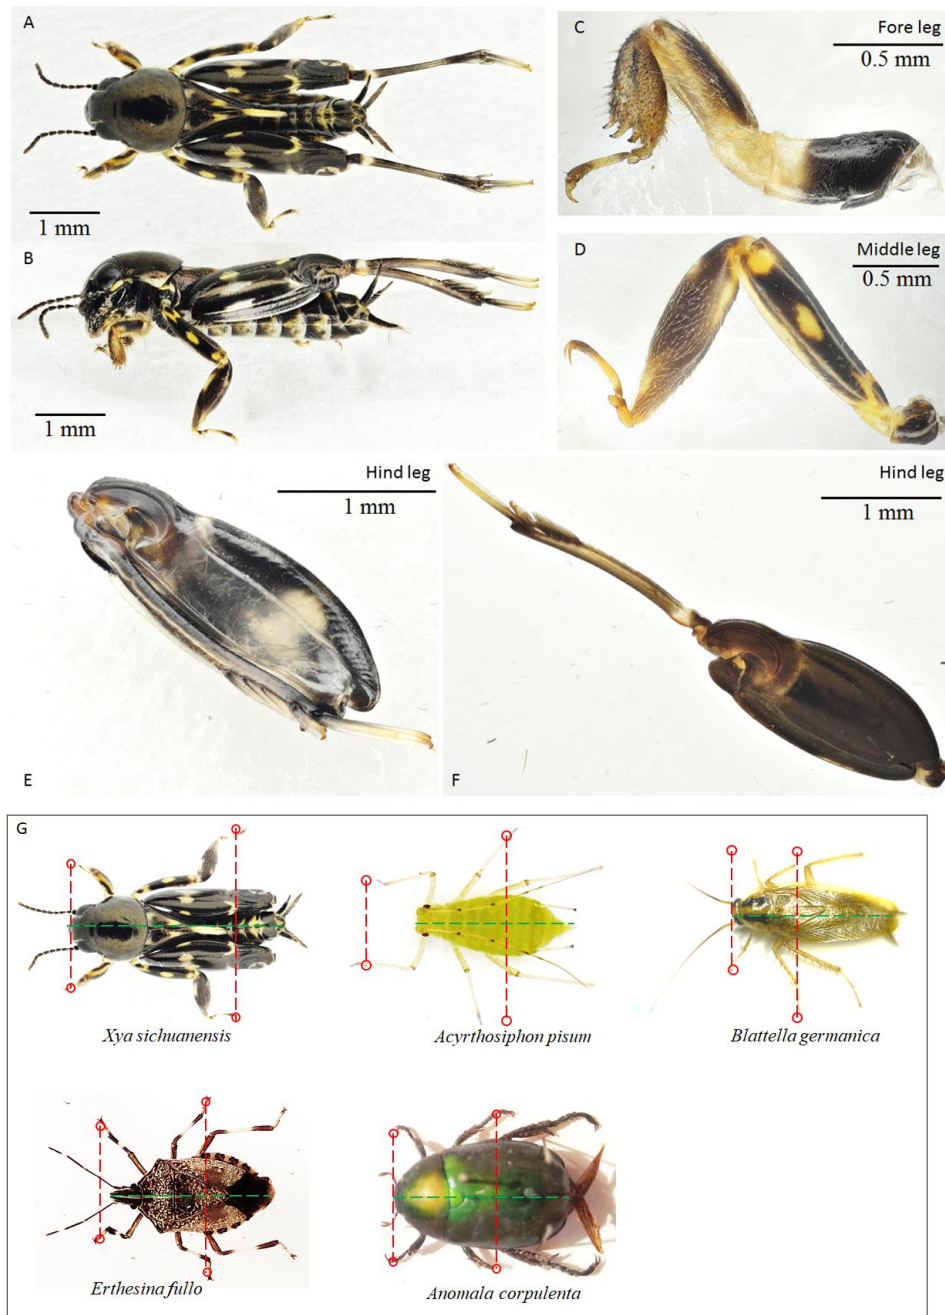

150

151 Fig.1 Body structure of the pygmy mole cricket *Xya sichuanensis*. Dorsal and side view of whole body are  
152 shown in A and B. Magnified legs are shown in C, D, E and F. The length ratio of two parts to intersection  
153 of the midline and the line connecting of two middle tarsi (anterior part/posterior part; 4.037) of *X.*  
154 *sichuanensis* and other selected insects (*Acyrtosiphon pisum*, *Blattella germanica*, *Erthesina fullo*,  
155 *Anomala corpulenta*, reared at the Key Laboratory of Applied Entomology or collected from University  
156 Museum Garden, Northwest A&F University, Yangling, Shaanxi, China) are shown in G.  
157

158 The middle legs are relatively longer (femur,  $1.318 \pm 0.030$  mm; tibia,  $1.139 \pm 0.043$  mm,  
159  $N = 5$ , Fig. 1D) and their tarsi are located posteriorly. The length ratio of two parts to  
160 intersection of the midline and the line connecting of two middle tarsi (anterior part/posterior



161 part; 4.037) of *X. sichuanensis* is notably higher than other selected insects, underlining the  
162 comparatively wider supporting area for four legs of *X. sichuanensis* relative to other insects  
163 (*Acyrtosiphon pisum*, 1.226; *Blattella germanica*, 0.947; *Erthesina fullo*, 1.409; *Anomala*  
164 *corpulenta*, 1.483, Fig. 1G).

165 The un-flexed hind legs of *X. sichuanensis* were found to be longest, with measurements  
166 of  $2.292 \pm 0.026$  mm for the femur and  $1.869 \pm 0.478$  mm for the tibia (N = 5). The flexed  
167 hind legs exhibited no contact with the ground in either stationary or moving states (Fig 1E &  
168 F).

169 The tibia fits in a groove of the femur when the hind leg is fully flexed, and three cover  
170 plates of each sides of the femur are cover the pivot joint (Fig. 2A & B). Meanwhile, we noted  
171 that the entire flexed hind legs could also be grooved along the dorsal surface of the  
172 abdominal segments (Fig. 2C). The triangular wings (both fore and hind wings) of *X.*  
173 *sichuanensis* are short ( $2.09 \pm 0.055$  mm in length) and cover less than 2/3 abdominal  
174 segments by length ( $3.57 \pm 0.037$  mm, without cerci, Fig. 2D-F). All of these parts fit together  
175 to form an integrated structure (Fig. 2C & E).

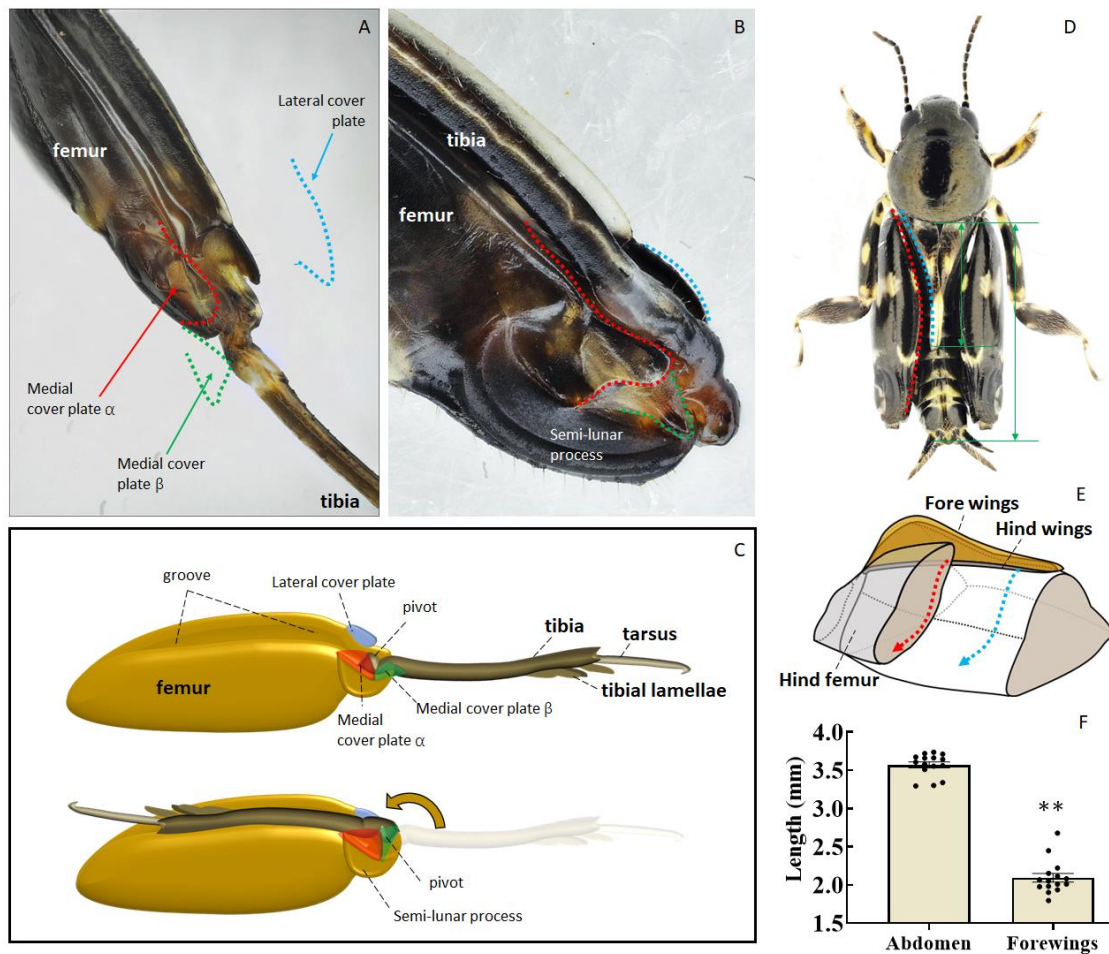

176  
177  
178  
179  
180  
181

Fig. 2. Images and sketches of the structures of the hind leg. The femuro-tibial joint of a hind leg is shown in A and B. A sketch of a hind leg is shown in C. Length ratio and structural sketches of the hind leg and abdomen are shown in D, E and F. \*\* in panel F indicates significant difference at  $P < 0.001$  (Student's  $t$ -test).

### 182 3.2. Abdomen

183 The abdominal ventral cuticle segments exhibit flat surfaces (especially A2, A3 and A4  
184 segments) and make contact with the ground (Fig. 3A & B, could also be found in Fig. 4B).

185 The hind leg coxas of both sides show a similar flat surface (Fig. 3B). Two types of trichome  
186 structures can be seen in the abdominal ventral cuticle; the longer trichome structure is about  
187  $183.7 \pm 9.5 \mu\text{m}$ , while the short one is about  $66.6 \pm 1.8 \mu\text{m}$ . The scale-like cuticle units with  
188 small convex could be detected under high magnification (Fig. 3C & D).

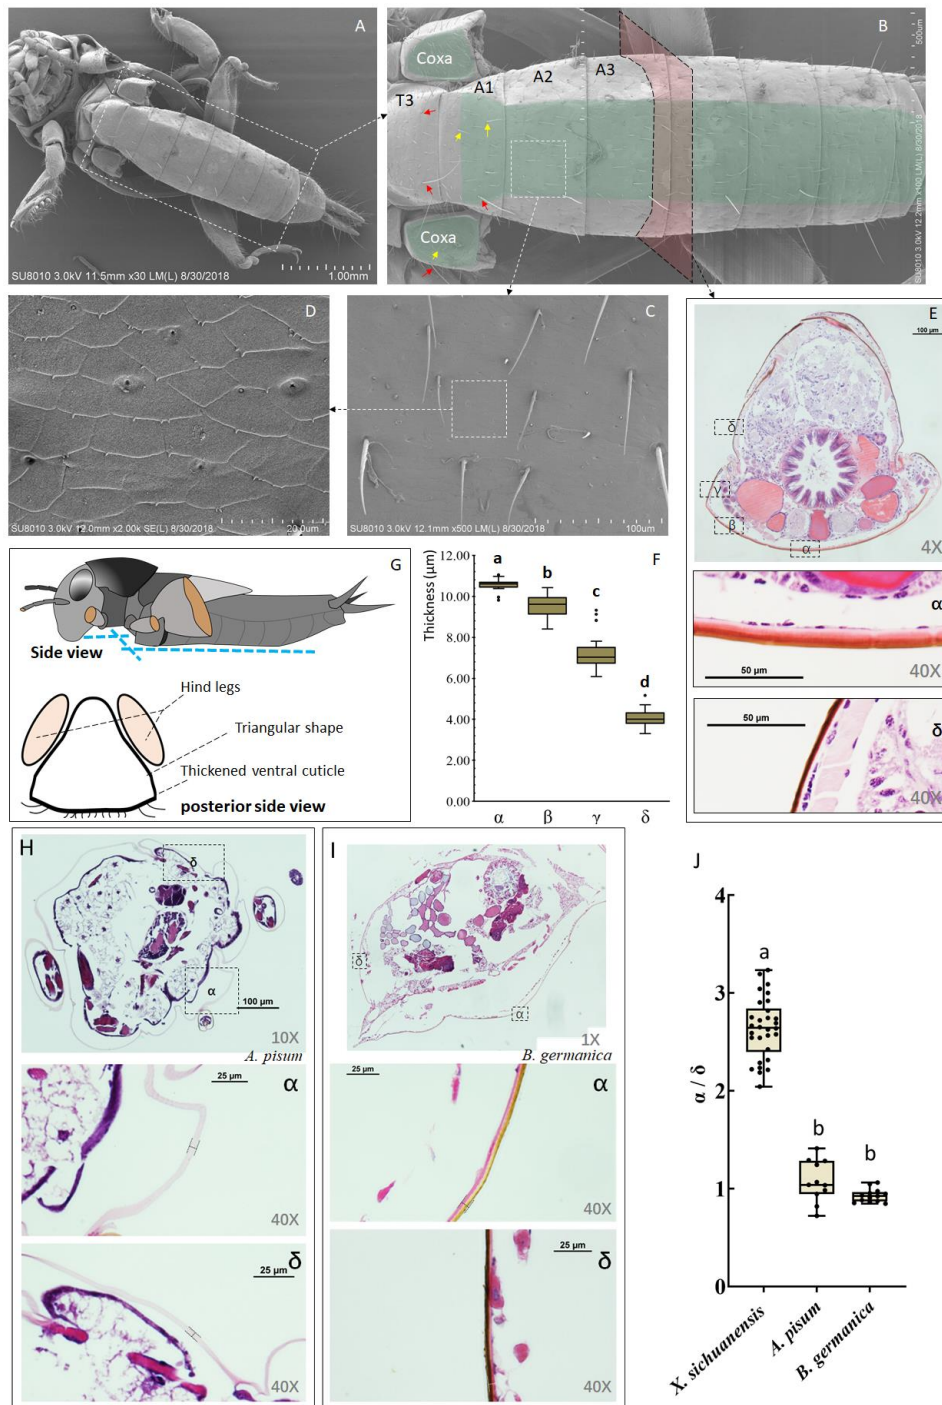

189

190 Fig. 3. Scanning electron micrograph (A-D) and histological sectioning of abdominal cross section (E) of  
 191 the abdomen. The thickness of the abdominal ventral cuticle is shown in E-α and E-β, and quantified results  
 192 are shown in F; different letters above bars in panel F indicate significant differences in values (ANOVA,  
 193 Duncan's test,  $P < 0.05$ ). Sketch of abdomen from the side and posterior side views are shown in G.

194 Histological sectioning of abdominal cross section of *A. pisum* (H) and *B. germanica* (I). The thickness  
 195 ratio of ventral abdominal cuticle (α) and side abdominal cuticle (δ) among three insect species (*X.*  
 196 *sichuanensis*, *A. pisum* and *B. germanica*) shows in J.  
 197

198 Histological sectioning of abdominal crosscutting showed a varied thickness of the

199 cuticle at different positions. The cuticle at the ventral position (which is in contact with the

200 ground and measured about 10.6  $\mu\text{m}$  on average) is significantly thicker than those of other  
201 locations ( $F = 715.834$ ;  $df = 3, 116$ ;  $P < 0.001$ ; Fig. 3E & F). Meanwhile, compared with *X.*  
202 *sichuanensis*, the thickness differences between ventral cuticle and side cuticle were  
203 significantly lower in some other insect species (*A. pisum* and *B. germanica*;  $F = 281.09$ ;  $df =$   
204  $2, 51$ ;  $P < 0.001$ ; Fig. 3H, I&J).

### 205 3.3. Walking

206 We observed two types of walking patterns in our studies: fast-walking (running) and  
207 slow-walking. The average speed of fast-walking was approximately ten times faster than  
208 slow-walking ( $T = -21.801$ ;  $df = 33$ ;  $P < 0.001$ ; Fig. 4A), and the associated patterns of leg  
209 movement were also notably different.

#### 210 3.3.1. Fast-walking (running)

211 The fast-walking process of *X. sichuanensis* was divided into four steps. In a stride cycle,  
212 it started with movement of the left fore leg (L1). The right middle leg (R2) was lifted before  
213 L1 reached its target point ahead; right fore leg (R1) and left middle leg (L2) are pivot legs at  
214 this stage. Meanwhile, the abdomen was involved as a fulcrum point. Similarly, after L1 and  
215 R2 reached their target points, R1 and L2 mirrored that same movement (Fig. 4C). The  
216 alternation of four steps in one cycle continued during straight running (Fig. 4D&E). The  
217 movements of the left fore leg and right mid leg occurred at the same time during one phase,  
218 and the right fore leg and left mid leg moved at the same time in the second phase (Fig. 4F).

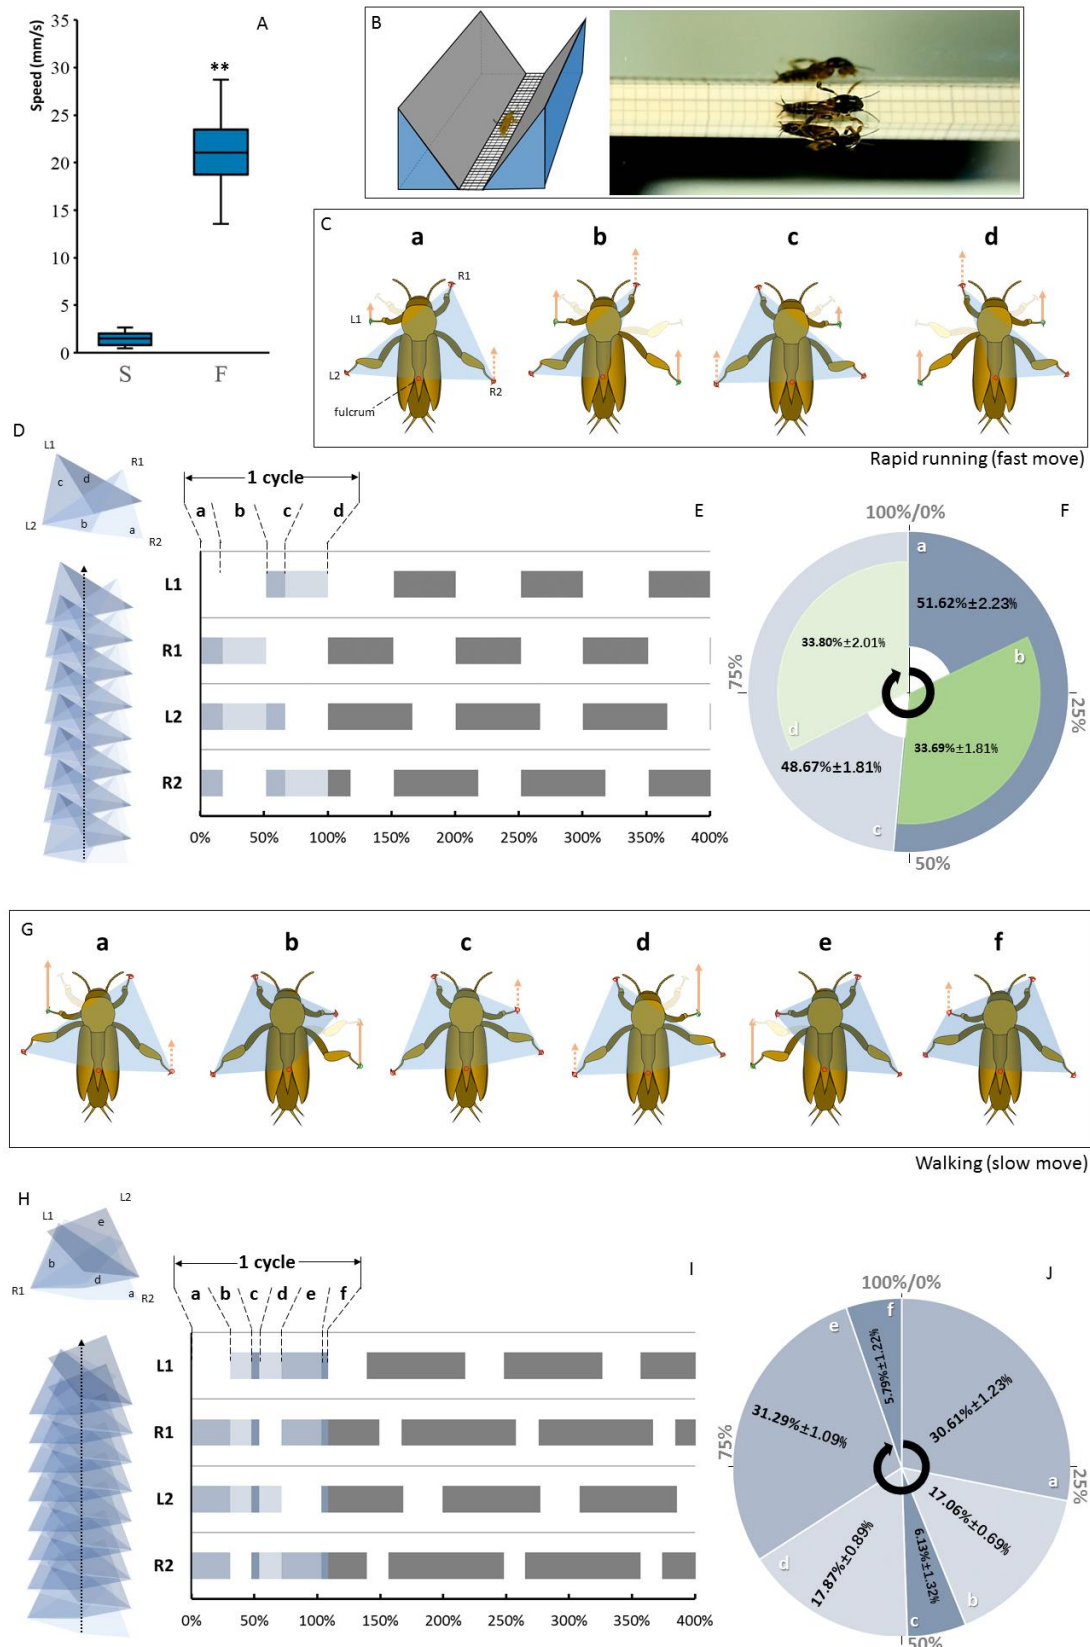

219

220

221

222

223

Fig. 4. Two types of walking patterns of *Xya sichuanensis* were measured in our data. The observation device used for these studies is shown in B. Fast-walking is shown in C-F, and slow-walking is shown in G-J. The individual walking stages for the two types of walking are shown in C and G, the ground-contact polygons a marked in the images and then merged and overlaid to create moving sequences (D and H);



224 alternating stepping patterns during two types of walking are shown in E and F, and proportions of each  
225 step's time spent in each moving cycle were calculated and shown in F and J. Lower-case letters in D-F (a,  
226 b, c and d) represent corresponding stages shown in C, and lower-case letters in H-J (a, b, c, d, e and f)  
227 represent corresponding stages shown in G. The velocity difference between these two types of walking is  
228 shown in A; \*\* indicates significant difference at  $P < 0.001$  (Student's  $t$ -test).  
229

### 230 3.3.2. Slow-walking

231 The slow-walking process of *X. sichuanensis* was divided into six steps. In a stride cycle,  
232 it also started with L1, however R2 was not lifted until L1 reached its target point. After R2  
233 reached its target point, there was a short delay before R1 was lifted during which all five  
234 supporting points (four tarsi and abdominal ventral cuticle) were in contact with the ground;  
235 Similarly, in the next stage, R1 was then lifted, and L2 did not lift until R1 reached its target  
236 point (Fig. 4G-J).

237

## 238 4. Discussion

239 In this study, we investigated the biological features and physiological adaptations  
240 underlying the unique walking movements of the pygmy mole cricket *X. sichuanensis*. The  
241 positions of tarsi points with respect to the ground, the integrated hind leg-abdomen structure,  
242 the thickened abdominal ventral cuticle, and the pattern of leg movement during walking all  
243 show a specific pattern of development and biological adaptation to allow four-legged  
244 walking in the context of specialized jumping.

245 *Xya sichuanensis* is not the only insect species walked by four legs, however, it is not a  
246 typical four-legged" insect species; in contrast with other "four-legged" insects (mid-hind  
247 legged walking; Roeder 1937; Dickinson 2003; Hu et al., 2003; Wolfe et al.; 2011), *X.*  
248 *sichuanensis* uses its fore and mid legs for movement, and the abdomen is also used to  
249 support the body. Together, there are five supporting anatomical points during walking. *X.*  
250 *sichuanensis*'s fore legs are reported to be developed for digging and burrowing, and its mid  
251 legs are adapted to contact ground posteriorly for better walking using only four legs. It is

252 clear that the great extension of the four legs (especially the mid legs) and ground-touching  
253 abdomen could offer a relatively wider supporting area and better stability during “four-  
254 legged” walking. This finding preliminary explained the feasibility that *X. sichuanensis* could  
255 use only four legs for its supporting or even walking. Similar phenomenon could also be  
256 observed in some other insect species, which their fore and mid legs have a greater  
257 participation at body supporting and walking (Usherwood and Runion 1970; Burns 1973).

258 *Xya sichuanensis* has six fully functional legs, compared with fore and mid legs, we  
259 found that the hind legs of *X. sichuanensis* exhibited no effect on walking and are mostly  
260 flexed on the dorsal side during walking. The function of the hind leg appears to be relatively  
261 independent and specialized for jumping like other Orthoptera species (Burrows and Picker  
262 2010; Burrows and Sutton 2012). The uniquely developed structures of the legs and abdomen  
263 support this hypothesis. The short fore and hind wings of *X. sichuanensis* only cover part of  
264 the abdomen. This allows the whole flexed hind legs to also be grooved along the dorsal  
265 surface of the abdomen and fit together to form an integrated structure. We believe that there  
266 is a direct relationship between these specialized hind legs and specific morphological  
267 adaptations of the abdominal structure. Together, these studies reveal that the hind legs of *X.*  
268 *sichuanensis* have developed in support of optimized jumping and cannot be used for walking.  
269 The jumping behavior of *X. sichuanensis* possibly drives certain organs specialization and  
270 determines the developing direction. In this case, the importance of improved jumping  
271 outweighs six-legged walking, and indicating that jumping has a greater significance for its  
272 survival; and in turn, the special role of hind legs drives other four legs developing in support  
273 of walking.

274 The abdominal physiological characters of *X. sichuanensis* were also observed to possess  
275 special adaptations to allow four-legged walking. As discussed, the hind legs and abdomen fit  
276 together and the wings that cover the abdomen are shortened. Further, we noticed other



277 special features in the ventral cuticle of abdominal segments (flat surfaces). Similarly, it was  
278 also observed at the ventral cuticle and the bottom of the hind coxas. We believe that, as this  
279 insect species has a relatively long cylindrical body shape, these specific angle variations  
280 among segments could support the abdomen's use as a fifth fulcrum during walking. In this  
281 case, the ventral cuticular tissues of those structures is specialized for the function: a  
282 significantly thickened ventral cuticle observed, which was most likely adapted to protect the  
283 abdomen from friction during walking; and we did not detect this ventral cuticular thickening  
284 in other experimental species. It is a reasonable physiological character for special walking  
285 behavior of *X. sichuanensis*, and this specialization is believed to be one of the biological  
286 foundations for “abdominal supporting” during its working. Meanwhile, there were also two  
287 types of trichome structures detected at the abdominal ventral cuticle, which are possibly used  
288 for sensation during walking. It is obviously that the abdomen tissues have specialized in both  
289 morphology and functions to adapt to “four-legged” walking. These observed features from  
290 walking behavior to biological characteristics reflect an integrated structural and  
291 physiological adaptation to selective pressure from the environment.

292 Based on those biological features mentioned above, *X. sichuanensis* is well-suited for  
293 four-legged walking and very poorly suited for a typical tripedal gait (Hughes 1952; Wilson  
294 1966; Dickinson et al., 2000; Goldman et al., 2006). We intent to figure out the details of *X.*  
295 *sichuanensis* walking with its four legs. Unfortunately, due to limited equipment capacity,  
296 only two types of walking patterns were identified in our data, and it should be varied for *X.*  
297 *sichuanensis* to adapt to complex walking conditions. These moving patterns were similar to  
298 the grasshopper *Tropidopola cylindrica*, which has also been observed to use the abdomen as  
299 a supporting fulcrum for walking (Wilson 1966). Although some other four-legged walking  
300 insect species, such as mantis generally uses its mid and hind legs for walking, the gait  
301 patterns between *X. sichuanensis* and mantis were relatively similar (Roeder 1937). It is a

302 convergence adaptation on behavior level among different species; and these insect species  
303 happened to select this effective pattern to handle walking problem without another two legs  
304 (although the pairs of un-participated legs are different). The movement process and many  
305 biological features of *X. sichuanensis* appear to be perfectly suited to this “four-legged”  
306 walking. This phenomenon reveals the adaptability of a highly specialized behavior in support  
307 of survival. Combining with the importance of jumping behavior of *X. sichuanensis* that  
308 reported (Burrows and Picker 2010; Burrows and Sutton 2012), we believe that the  
309 emergence of this specialized walking behavior is fundamentally induced by environmental  
310 pressure that has increased the weight of jumping behavior for this species.

311 In brief, this study reveals that insects have strong plasticity at both the physiological and  
312 behavioral levels, which is expressed as a specialization of body structures, forms, and  
313 behaviors. We believe that characteristics that favor the survival of species will be  
314 preferentially preserved, such as the jumping behavior of *X. sichuanensis*, and that other  
315 biological characteristics will adapt in support of those specialized structures. We expect that  
316 similar characteristics may be found in other jumping insects. This finding could be helpful  
317 for understanding the biological adaptations underlying insect behavior, and provides new  
318 data to describe the diversity of walking among insects.

319

### 320 **Acknowledgments**

321 We are grateful for the assistance of all staff and students in the Key Laboratory of Applied  
322 Entomology, Northwest A&F University, and students in College of Plant Protection,  
323 Shandong Agricultural University, China.

### 324 **Competing interests**

325 We have no competing interests.

### 326 **Formatting of funding sources**

327 Funding of this research was supported by the Chinese Universities Scientific Fund (grant  
328 number, Z109021718).

329

### 330 **References**

331 Burns, M.D., 1973. The control of walking in Orthoptera: I. Leg movements in normal  
332 walking. *Journal of Experimental Biology*, 58, 45-58.

333 Burrows, M., 2003. Biomechanics: frog hopper insects leap to new heights. *Nature*, 424, 509.

334 Burrows, M., 2009. Jumping performance of planthoppers (Hemiptera, Issidae). *Journal of*  
335 *Experimental Biology*, 212, 2844-2855.

336 Burrows, M. and Sutton, G.P., 2012. Pygmy mole crickets jump from water. *Current Biology*,  
337 22, R990-R991.

338 Burrows, M. and Sutton, G., 2013. Interacting gears synchronize propulsive leg movements in  
339 a jumping insect. *science*, 341, 1254-1256.

340 Burrows, M. and Picker, M.D., 2010. Jumping mechanisms and performance of pygmy mole  
341 crickets (Orthoptera, Tridactylidae). *Journal of Experimental Biology*, 213, 2386-2398.

342 Cao, C. Q., Shi, J. P. & Yin, Z. 2018. A new species of the genus *Xya* Latreille, 1809 from  
343 China (Orthoptera, Tridactyloidea, Tridactylidae). *Zootaxa*, 4413 (2): 397–400.

344 Cruse, H., 1976. The function of the legs in the free walking stick insect, *Carausius morosus*.  
345 *Journal of Comparative Physiology*, 112, 235-262.

346 Dickinson, M.H., Farley, C.T., Full, R.J., Koehl, M.A.R., Kram, R. and Lehman, S., 2000.  
347 How animals move: an integrative view. *science*, 288, 100-106.

348 Dickinson, M., 2003. Animal locomotion: how to walk on water. *Nature*, 424, 621.

349 Full, R.J. and Tu, M.S., 1991. Mechanics of a rapid running insect: two-, four- and six-legged  
350 locomotion. *Journal of Experimental Biology*, 156, 215-231.

351 Grabowska, M., Godlewska, E., Schmidt, J. and Daun-Gruhn, S., 2012. Quadrupedal gaits in  
352 hexapod animals—inter-leg coordination in free-walking adult stick insects. *Journal of*  
353 *Experimental Biology*, 215, 4255-4266.

354 Goldman, D.I., Chen, T.S., Dudek, D.M. and Full, R.J., 2006. Dynamics of rapid vertical  
355 climbing in cockroaches reveals a template. *Journal of Experimental Biology*, 209, 2990-3000.

356 Hu, D.L., Chan, B. and Bush, J.W., 2003. The hydrodynamics of water strider locomotion.  
357 *Nature*, 424, 663.

358 Hughes, G.M., 1952. The Co-Ordination of insect movements: I The walking movements of  
359 insects. *Journal of Experimental Biology*, 29, 267-285.

- 360 Münsch, T., Fartmann, T., Machalett, B. and Poniatowski, D., 2013. The pygmy mole cricket  
361 *Xya variegata* as an indicator for dynamic river systems. *Journal of insect conservation*, 17,  
362 521-528.
- 363 Roeder, K.D., 1937. The control of tonus and locomotor activity in the praying mantis  
364 (*Mantis religiosa* L.). *Journal of Experimental Zoology*, 76, 353-374.
- 365 Usherwood, P.N.R. and Runion, H.I., 1970. Analysis of the mechanical responses of  
366 metathoracic extensor tibiae muscles of free-walking locusts. *Journal of Experimental*  
367 *Biology*, 52, 39-58.
- 368 Wolfe, J.M., Oliver, J.C. and Monteiro, A., 2011. Evolutionary reduction of the first thoracic  
369 limb in butterflies. *Journal of Insect Science*, 11, 66.
- 370 Wilson, D.M., 1966. Insect walking. *Annual review of entomology*, 11, 103-122.
